# Supplementary material
Source: PubMed Central journal article supplement (PMC6705194)
Supplement: ao9b00944_si_001.pdf [file ao9b00944_si_001.pdf]

## **Supporting Information**

**Strategic development of a next-generation multi-epitope vaccine to prevent Nipah virus zoonotic infection**

**Rupal Ojha, Aditi Pareek, Rajan K. Pandey, Dhaneswar Prusty, Vijay K. Prajapati\***

**Rupal Ojha** - Department of Biochemistry, School of Life Sciences, Central University of Rajasthan, NH-8, Bandarsindri, Kishangarh, 305817, Ajmer, Rajasthan, India.

**Aditi Pareek**- Department of Biochemistry, School of Life Sciences, Central University of Rajasthan, NH-8, Bandarsindri, Kishangarh, 305817, Ajmer, Rajasthan, India.

**Rajan K. Pandey**- Department of Biochemistry, School of Life Sciences, Central University of Rajasthan, NH-8, Bandarsindri, Kishangarh, 305817, Ajmer, Rajasthan, India.

**Dhaneswar Prusty**- Department of Biochemistry, School of Life Sciences, Central University of Rajasthan, NH-8, Bandarsindri, Kishangarh, 305817, Ajmer, Rajasthan, India.

**Vijay K. Prajapati\***- Department of Biochemistry, School of Life Sciences, Central University of Rajasthan, NH-8, Bandarsindri, Kishangarh, 305817, Ajmer, Rajasthan, India.

**Running Title**- Multi-epitope immunization for Nipah virus

**\*Corresponding author address**

**Dr. Vijay Kumar Prajapati**  
Department of Biochemistry,  
School of Life Sciences,  
Central University of Rajasthan,  
NH-8, Bandarsindri, Kishangarh,  
305817, Ajmer, Rajasthan, India  
Email- vkprajapati@curaj.ac.in

1. ADJUVANT-N LINKER-BCE-CTL-HTL

GIINTLQKYYCRVRGGRCVLSCLPKEEQIGKCSTRGRKCCRRKKEAAAKFAGSSSEVIVKKLEFEDEF  
AGSKKFEDEFAGSSSKMEVLKEEAWRKKFAPGGYPLLWKKPEIDENGSMIKKVILHYEKLSSKIGP  
KVSLIDTAAYVLMGVINSIAAYKTLIRTHIKAAYMPKSRGIPIAAYKVLSYAPEIAAYKSRGIPIKKAAY  
MPKSRGIPIAAYKVLSYAPEIAAYKSRGIPIKKAAYMPKSRGIPIAAYMMASILLTLAAYTLFRRTKKA  
AYAPVENLNKLAAYFMVEILIEVAAYTIKSLMLLYAAYRASAATATLAAYSLMDINPWLAAYRIFFLSI  
TKAAYNPWLNRLTWAAYMLSMIILYVAAAYKLSKIGLVKAAAYTPIKGALEIAAYKLISYTLPVAAAYRLSI  
GSPSKAAYKPENCRLSMGPGPGLLGSIVIIVMNIMIIGPGGLEFEDEFAGSSSEVIGPGPGLEFEDEFAGS  
SSEVIGPGPGEFEDEFAGSSSEVIVGPGPGLLTLFRRTKKKYRRHGPGPGHAGGIDQNMANRLGLGPGP  
GHIKINGVISKRLFAQGPGPILNKRYYSNLLILIL

2. ADJUVANT-N LINKER-BCE-HTL-CTL

GIINTLQKYYCRVRGGRCVLSCLPKEEQIGKCSTRGRKCCRRKKEAAAKFAGSSSEVIVKKLEFEDEF  
AGSKKFEDEFAGSSSKMEVLKEEAWRKKFAPGGYPLLWKKPEIDENGSMIKKVILHYEKLSSKIGP  
KVSLIDTGPGPGLLGSIVIIVMNIMIIGPGGLEFEDEFAGSSSEVIGPGPGLEFEDEFAGSSSEVIGPGPGEF  
EDEFAGSSSEVIVGPGPGLLTLFRRTKKKYRRHGPGPGHAGGIDQNMANRLGLGPGPGHIKINGVISKR  
LFAQGPGPILNKRYYSNLLILILAAAYVLMGVINSIAAYKTLIRTHIKAAYMPKSRGIPIAAYKVLSYAPE  
IAAYKSRGIPIKKAAYMPKSRGIPIAAYKVLSYAPEIAAYKSRGIPIKKAAYMPKSRGIPIAAYMMASILL  
TLAAYTLFRRTKKAAYAPVENLNKLAAYFMVEILIEVAAYTIKSLMLLYAAYRASAATATLAAYSL  
MDINPWLAAYRIFFLSITKAAYNPWLNRLTWAAYMLSMIILYVAAAYKLSKIGLVKAAAYTPIKGALEIAA  
YKLISYTLPVAAAYRLSIGSPSKAAYKPENCRLSM

3. ADJUVANT-N LINKER-CTL-BCE-HTL

GIINTLQKYYCRVRGGRCVLSCLPKEEQIGKCSTRGRKCCRRKKEAAAKVLMGVINSIAAYKTLIRTH  
IKAAYMPKSRGIPIAAYKVLSYAPEIAAYKSRGIPIKKAAYMPKSRGIPIAAYKVLSYAPEIAAYKSRGIPI  
KKAAYMPKSRGIPIAAYMMASILLTLAAYTLFRRTKKAAYAPVENLNKLAAYFMVEILIEVAAYTIKS  
LMLLYAAYRASAATATLAAYSLMDINPWLAAYRIFFLSITKAAYNPWLNRLTWAAYMLSMIILYVAA  
YKLSKIGLVKAAAYTPIKGALEIAAYKLISYTLPVAAAYRLSIGSPSKAAYKPENCRLSMKKFAGSSSEVIV  
KKLEFEDEFAGSKKFEDEFAGSSSKMEVLKEEAWRKKFAPGGYPLLWKKPEIDENGSMIKKVILHY  
EKLSSKIGPKVSLIDTGPGPGLLGSIVIIVMNIMIIGPGGLEFEDEFAGSSSEVIGPGPGLEFEDEFAGSS  
EVIGPGPGEFEDEFAGSSSEVIVGPGPGLLTLFRRTKKKYRRHGPGPGHAGGIDQNMANRLGLGPGPGH  
IKINGVISKRLFAQGPGPILNKRYYSNLLILIL

4. ADJUVANT-N LINKER-CTL-HTL-BCE

GIINTLQKYYCRVRGGRCVLSCLPKEEQIGKCSTRGRKCCRRKKEAAAKVLMGVINSIAAYKTLIRTH  
IKAAYMPKSRGIPIAAYKVLSYAPEIAAYKSRGIPIKKAAYMPKSRGIPIAAYKVLSYAPEIAAYKSRGIPI  
KKAAYMPKSRGIPIAAYMMASILLTLAAYTLFRRTKKAAYAPVENLNKLAAYFMVEILIEVAAYTIKS  
LMLLYAAYRASAATATLAAYSLMDINPWLAAYRIFFLSITKAAYNPWLNRLTWAAYMLSMIILYVAA  
YKLSKIGLVKAAAYTPIKGALEIAAYKLISYTLPVAAAYRLSIGSPSKAAYKPENCRLSMKKFAGSSSEVIV  
KKLEFEDEFAGSKKFEDEFAGSSSKMEVLKEEAWRKKFAPGGYPLLWKKPEIDENGSMIKKVILHY  
EKLSSKIGPKVSLIDTGPGPGLLGSIVIIVMNIMIIGPGGLEFEDEFAGSSSEVIGPGPGLEFEDEFAGSS  
EVIGPGPGEFEDEFAGSSSEVIVGPGPGLLTLFRRTKKKYRRHGPGPGHAGGIDQNMANRLGLGPGPGH  
IKINGVISKRLFAQGPGPILNKRYYSNLLILIL

5. ADJUVANT-N LINKER-HTL-BCE-CTL

GIINTLQKYYCRVRGGRCVLSCLPKEEQIGKCSTRGRKCCRRKKEAAAKLLGSIVIIVMNIMIIGPGP  
LEFEDEFAGSSSEVIGPGPGLEFEDEFAGSSSEVIGPGPGEFEDEFAGSSSEVIVGPGPGLLTLFRRTK  
RRHGPGPGHAGGIDQNMANRLGLGPGPGHIKINGVISKRLFAQGPGPILNKRYYSNLLILILKKFAGSS  
SEVIVKKLEFEDEFAGSKKFEDEFAGSSSKMEVLKEEAWRKKFAPGGYPLLWKKPEIDENGSMIKKV

GILHYEKLSSKIGPKVSLIDTAAYVLMGVINSIAAYKTLIRTHIKAAYMPKSRGIPIAAYKVLSYAPEIAA  
YKSRGIPIKKAAYMPKSRGIPIAAYKVLSYAPEIAAYKSRGIPIKKAAYMPKSRGIPIAAYMMASILLTLA  
AYTLFRRTKKKAAYAPVENLNKLAAAYFMVEILIEVAAYTIKSLMLLYAAYRASAATATLAAYSLMDIN  
PWLAAAYRIFFLSITKAAYNPWLNRLTWAAAYMLSMIILYVAAYKLSKIGLVKAAAYTPIKGALEIAAYKLI  
SYTLPVAAYRLSIGSPSKAAYKPENCRLSM

#### 6. ADJUVANT-N LINKER-HTL-CTL-BCE

GIINTLQKYYCRVRGGRCVLSCLPKEEQIGKCSTRGRKCCRRKKEAAKLLGSIVIIVMNIMIIGPGPG  
LEFEDEFAGSSSEVIGPGGLEFEDEFAGSSSEVIGPGGFEFEDEFAGSSSEVIVGPGPGLLTLFRRTKKKY  
RRHGPGPGHAGGIDQNMANRLGLGPGPGHIKINGVISKRLFAQGPFGILNKRYYSNLLILILAAAYVLM  
GVINSIAAYKTLIRTHIKAAYMPKSRGIPIAAYKVLSYAPEIAAYKSRGIPIKKAAYMPKSRGIPIAAYKV  
LSYAPEIAAYKSRGIPIKKAAYMPKSRGIPIAAYMMASILLTLAAYTLFRRTKKKAAYAPVENLNKLAA  
YFMVEILIEVAAYTIKSLMLLYAAYRASAATATLAAYSLMDINPWLAAAYRIFFLSITKAAYNPWLNRLT  
WAAAYMLSMIILYVAAYKLSKIGLVKAAAYTPIKGALEIAAYKLISYTLPVAAAYRLSIGSPSKAAYKPENC  
RLSMKKFAGSSSEVIVKLEFEDEFAGSKKFEDEFAGSSSKKMEVLKEEAWRKKFAPGGYPLLWKKPE  
IDENGSMIKKVGILHYEKLSSKIGPKVSLIDT

**Scheme S1 (1-6)-** Designed multi-epitope subunit vaccine constructs. The vaccine construct is consisting of 45 amino acid residues of adjuvant sequence ( $\beta$ -defensin), at N terminal end EAAAK linker was added which link the epitopes and adjuvant together. The B-cell epitope were united with KK linker whereas, GPGPG and AAY linkers were used for combining the, HTL and CTL epitopes, respectively.

**Table S1-** Predicted B-cell epitopes for the selected Nipah Virus proteins with their respective peptide sequences and scores

| <b>S.No.</b> | <b>Protein Name</b>       | <b>Peptide sequence</b> | <b>Score</b> |
|--------------|---------------------------|-------------------------|--------------|
| 1            | Phosphoprotein, Protein P | FAGSSSEVIV              | 0.8          |
| 2            | Protein W                 | LEFEDEFAGS              | 0.79         |
| 3            | Non-Structural Protein V  | FEDEFAGSSS              | 0.82         |
| 4            | Protein C                 | MEVLKEEAWR              | 0.82         |
| 5            | Nucleoprotein N           | FAPGGYPLLW              | 0.78         |
| 6            | Matrix Protein M          | PEIDENGSMI              | 0.9          |
| 7            | Fusion Glycoprotein F     | VGILHYEKLS              | 0.82         |
| 8            | Glycoprotein G            | IGPKVSLIDT              | 0.82         |

**Table S2**-Predicted HTL epitopes for the selected Nipah Virus proteins with their respective peptide sequences, percentile rank, IC50 value, allele and geographical distribution

| <b>S. No</b> | <b>Protein Name</b>       | <b>Peptide Sequence</b> | <b>Percentile Rank</b> | <b>IC50</b> | <b>Allele</b>  | <b>Geographical Distribution</b>                                          |
|--------------|---------------------------|-------------------------|------------------------|-------------|----------------|---------------------------------------------------------------------------|
| 1            | Phosphoprotein, Protein P | LEFEDEFAGSSSEVI         | 0.45                   | 41          | HLA-DRB1*07:01 | Australia, China, India, Indonesia, Philippines, Taiwan, Vietnam          |
| 2            | Protein W                 | EFEDEFAGSSSEVIV         | 0.56                   | 39          | HLA-DRB1*07:01 | Australia, China, India, Indonesia, Philippines, Taiwan, Vietnam          |
| 3            | Non-Structural Protein V  | LEFEDEFAGSSSEVI         | 0.45                   | 41          | HLA-DRB1*07:01 | Australia, China, India, Indonesia, Philippines, Taiwan, Vietnam          |
| 4            | Protein C                 | LLTLFRRTKKKYRRH         | 0.17                   | 6           | HLA-DRB5*01:01 | China, India, Indonesia, Philippines, Taiwan, Thailand                    |
| 5            | Nucleoprotein N           | HAGGIDQNMANRLGL         | 0.15                   | 17          | HLA-DRB1*13:02 | China, India, Indonesia, Philippines, Taiwan, Vietnam                     |
| 6            | Matrix Protein M          | HIKINGVISKRLFAQ         | 0.66                   | 27          | HLA-DRB1*07:01 | Australia, China, India, Indonesia, Philippines, Taiwan, Vietnam          |
| 7            | Fusion Glycoprotein F     | ILNKRYYSNLLILIL         | 0.31                   | 41          | HLA-DRB1*15:01 | Australia, Bangladesh, China, India, Indonesia, Taiwan, Thailand, Vietnam |
| 8            | Glycoprotein G            | LLGSIVIIVMNIMII         | 0.30                   | 40          | HLA-DRB1*15:01 | Australia, Bangladesh, China, India, Indonesia, Taiwan, Thailand, Vietnam |

**Table S3** -Predicted CTL epitopes by considering 3 supertypes along with their respective scores

| <b>S. No</b> | <b>Protein Name</b>       | <b>A2 Supertype</b> | <b>Score</b> | <b>A3 Supertype</b> | <b>Score</b> | <b>B7 Supertype</b> | <b>Score</b> |
|--------------|---------------------------|---------------------|--------------|---------------------|--------------|---------------------|--------------|
| 1            | Phosphoprotein, Protein P | VLMGVINSI           | 1.3173       | KTLIRTHIK           | 1.4482       | MPKSRGIPI           | 1.7638       |
| 2            | Protein W                 | KVLSYAPEI           | 1.2246       | KSRGIPIKK           | 1.4246       | MPKSRGIPI           | 1.7537       |
| 3            | Non-Structural Protein V  | KVLSYAPEI           | 1.2246       | KSRGIPIKK           | 1.4349       | MPKSRGIPI           | 1.7667       |
| 4            | Protein C                 | MMASILLTL           | 1.4762       | TLFRRTKKK           | 1.6469       | APVENLNKL           | 1.5393       |
| 5            | Nucleoprotein N           | FMVEILIEV           | 1.5545       | TIKSLMLLY           | 1.5024       | RASAATATL           | 1.5713       |
| 6            | Matrix Protein M          | SLMDINPWL           | 1.5699       | RIFFLSITK           | 1.7228       | NPWLNRLTW           | 1.3532       |
| 7            | Fusion Glycoprotein F     | MLSMIILYV           | 1.4056       | KLSKIGLVK           | 1.5671       | TPIKGALEI           | 1.0884       |
| 8            | Glycoprotein G            | KLISYTLPV           | 1.5522       | RLSIGSPSK           | 1.5554       | KPENCRISM           | 1.6985       |

**Table S4-** Physiochemical properties along with Antigenicity of designed vaccine constructs

| <b>Parameters</b>                     | <b>Construct 1</b> | <b>Construct 2</b> | <b>Construct 3</b> | <b>Construct 4</b> | <b>Construct 5</b> | <b>Construct 6</b> |
|---------------------------------------|--------------------|--------------------|--------------------|--------------------|--------------------|--------------------|
| <b>Number of Amino Acid</b>           | 592                | 592                | 591                | 591                | 589                | 589                |
| <b>Molecular Weight</b>               | 64464.05           | 64464.05           | 64415.06           | 64415.06           | 64355.01           | 64355.01           |
| <b>Isoelectric point</b>              | 9.77               | 9.77               | 9.8                | 9.8                | 9.79               | 9.79               |
| <b>Instability index</b>              | 38.6               | 38.46              | 38.36              | 38.36              | 38.46              | 38.61              |
| <b>Aliphatic Index</b>                | 95.73              | 95.73              | 95.55              | 95.55              | 96.21              | 96.21              |
| <b>GRAVY</b>                          | 0.042              | 0.042              | 0.025              | 0.025              | 0.037              | 0.037              |
| <b>Antigenicity</b>                   | 0.5249             | 0.5301             | 0.5197             | 0.5168             | 0.5114             | 0.5124             |
| <b>Estimated Half Life (in vitro)</b> |                    |                    |                    |                    |                    |                    |
| <b>(in vivo)</b>                      | 30 h               |
| <b>(E.coli)</b>                       | >20h               | >20h               | >20h               | >20h               | >20h               | >20h               |
|                                       | >10h               | >10h               | >10h               | >10h               | >10h               | >10h               |
